# Supplementary material for: Combined effect of body mass index and metabolic status on the risk of prevalent and incident chronic kidney disease: a systematic review and meta-analysis
Source: PubMed Central journal article supplement (PMC5482603; doi:10.18632/oncotarget.10915), 2016-08-10
Supplement: oncotarget-08-35619-s001.pdf [file oncotarget-08-35619-s001.pdf]

# **Combined effect of body mass index and metabolic status on the risk of prevalent and incident chronic kidney disease: a systematic review and meta-analysis**

**Supplementary Material**

**A**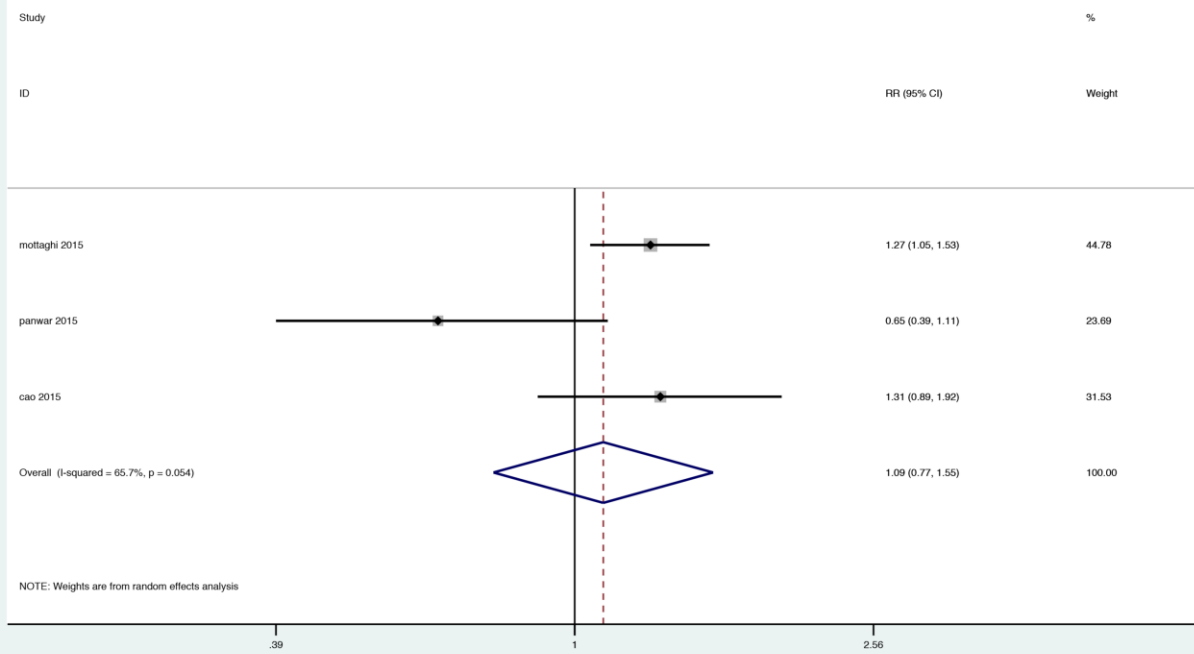**B**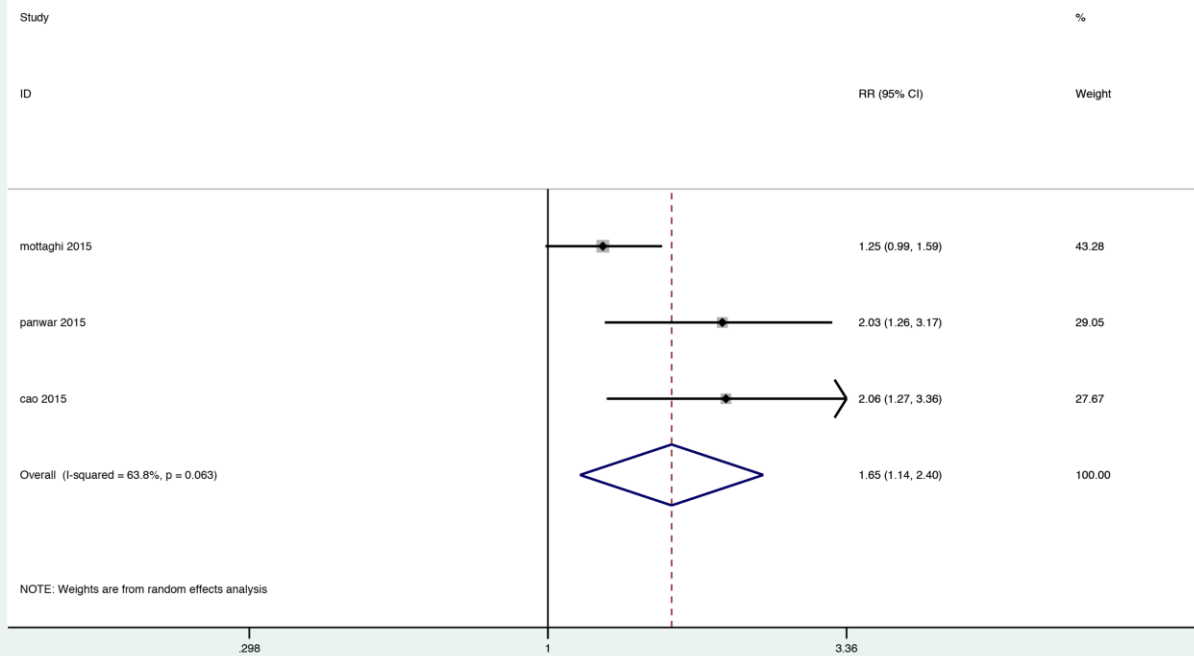

**Figure S1. Pooled relative risk of CKD in metabolically healthy overweight (A) and metabolically abnormal overweight (B) individuals.** Metabolically healthy normal weight individuals were taken as the reference group.

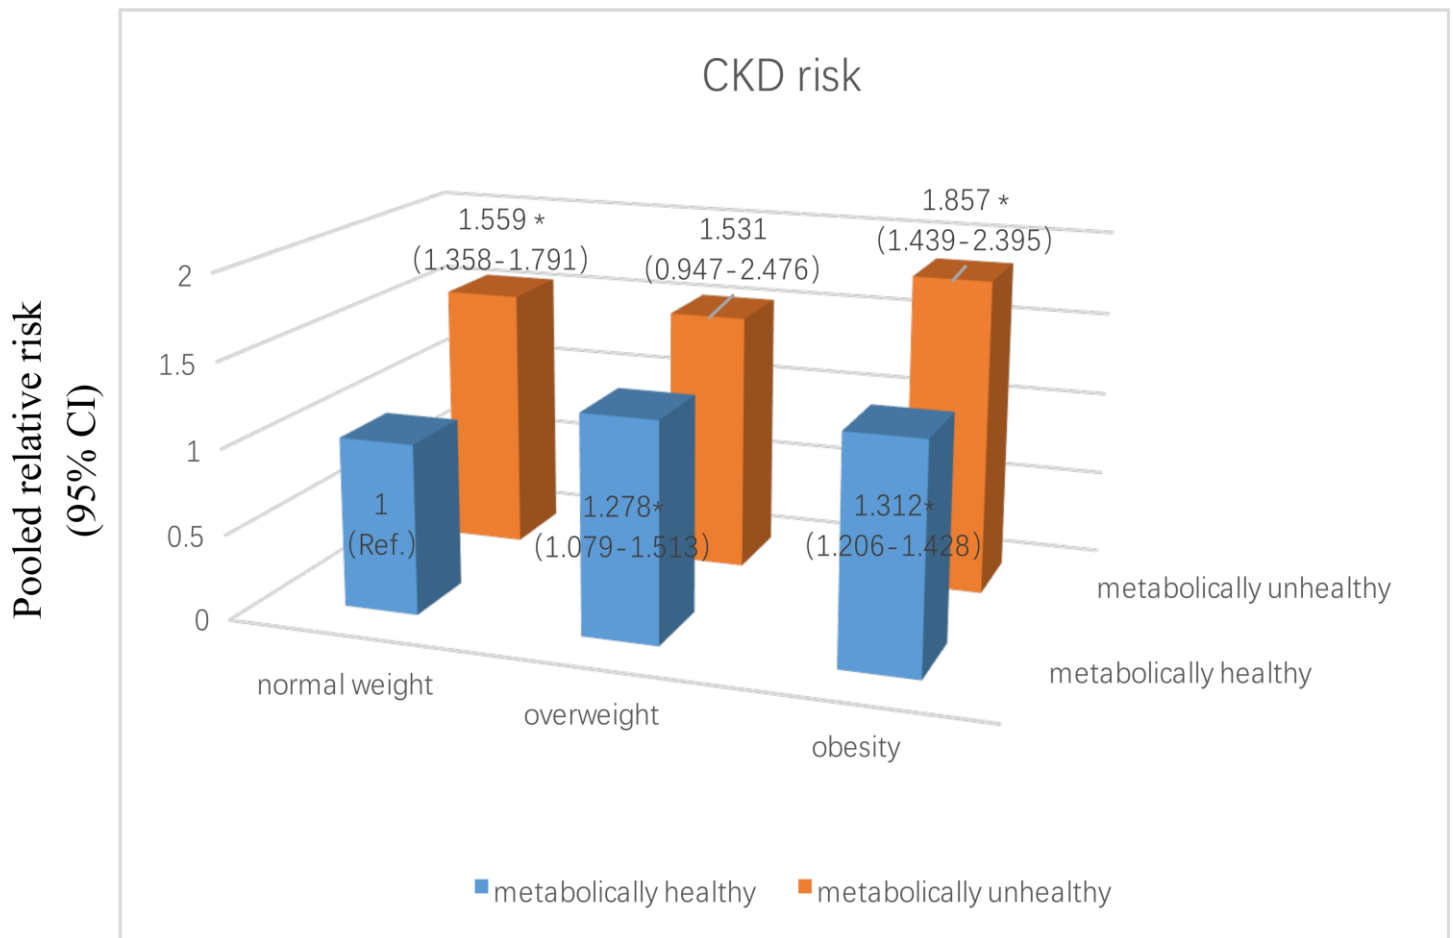

**Figure S2. Analysis of pooled relative risk for CKD in obesity-metabolic subphenotypes after excluding the study from Panwar et al**

The analyses were based on seven prospective studies, comprising 144878 participants and 3835 cases of incident CKD. \*P < 0.05, pooled relative risk was significantly different from the reference group (metabolically healthy normal weight group).

Abbreviation: Ref, reference group; CI, confidence interval.

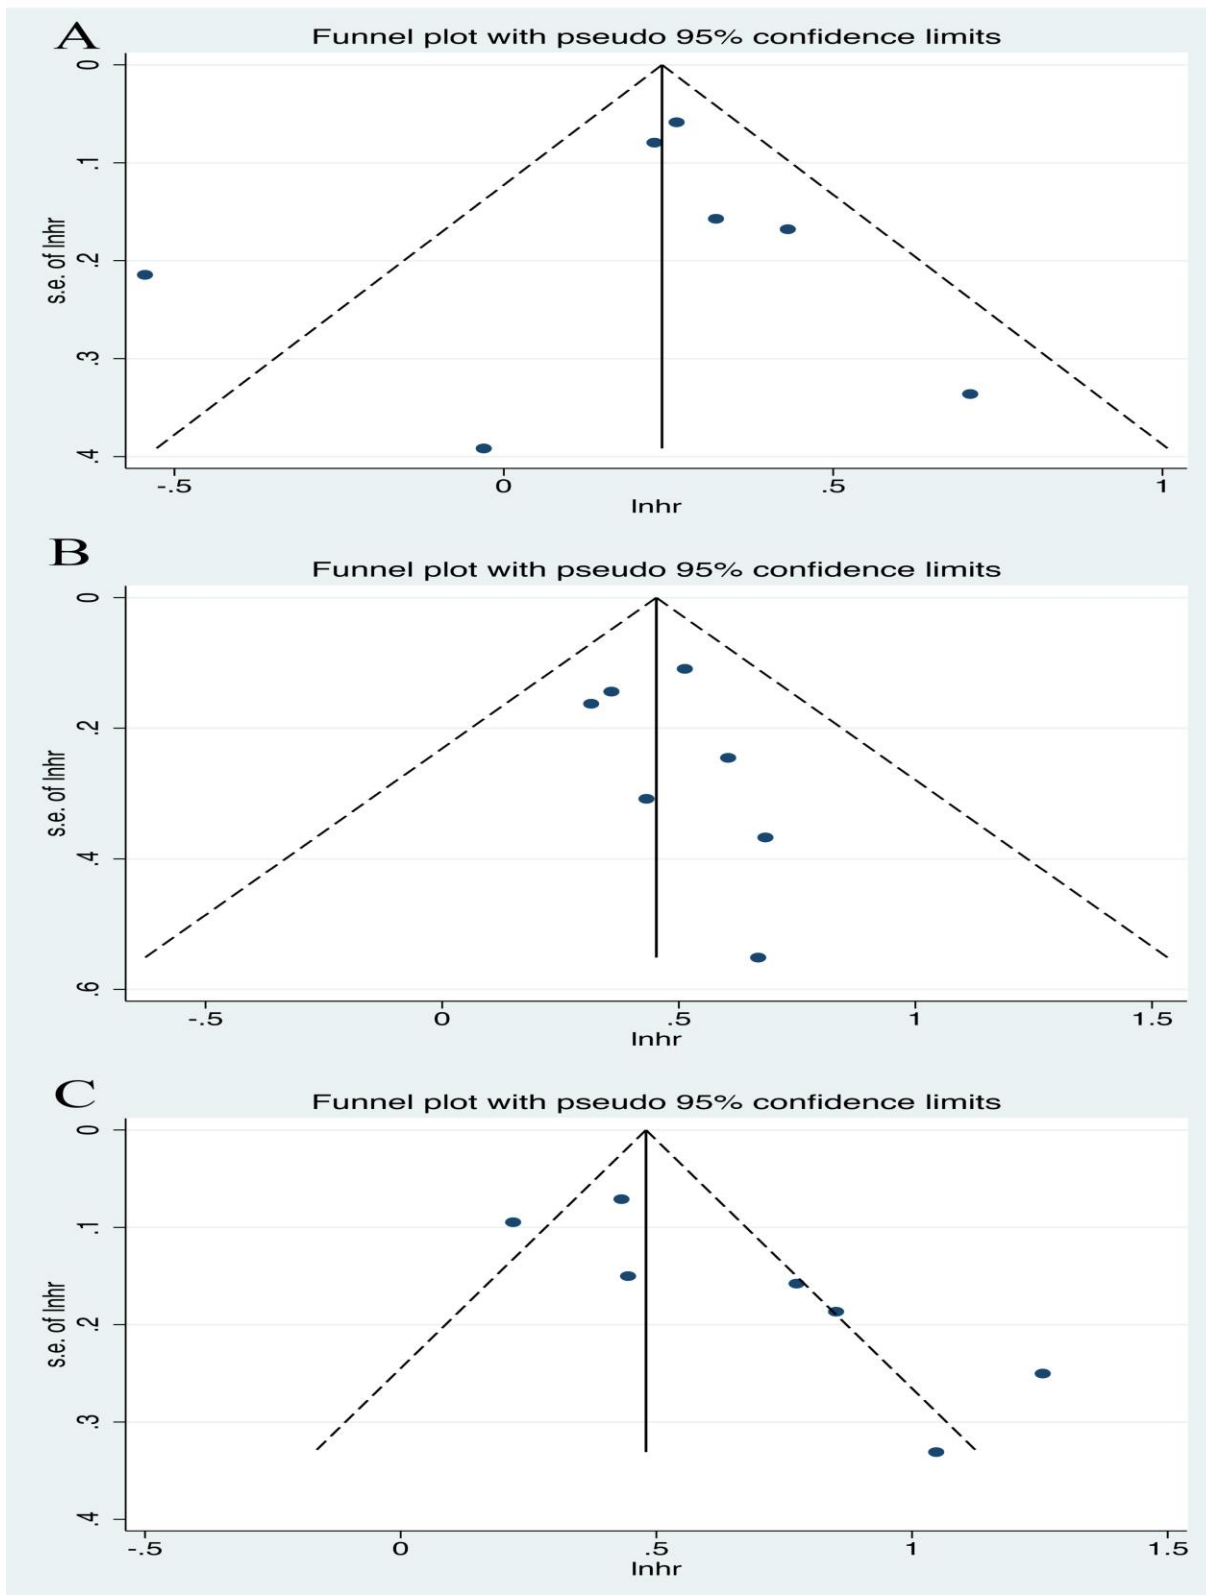

**Figure S3. Funnel plot of relative risks of CKD in obesity-metabolic subphenotypes.**

A: metabolically healthy obese individuals; B: metabolically abnormal normal weight individuals; C: metabolically abnormal obese individuals.

Supplementary table 1. Distribution of Participants, by Body Mass Index Category and Metabolic Status.

| Study, Year ( Reference ) | Normal weight, n (%) |               | Overweight, n (%) |               | Obese, n ( % ) |               |
|---------------------------|----------------------|---------------|-------------------|---------------|----------------|---------------|
|                           | Metabolically        | Metabolically | Metabolically     | Metabolically | Metabolically  | Metabolically |
|                           | Healthy              | unhealthy     | Healthy           | unhealthy     | Healthy        | unhealthy     |
| Chen et al, 2014(26)      | 432(18.6)            | 1017(43.8)    | NA                | NA            | 103(4.4)       | 772(33.2)     |
| Wang et al. 2014(24)      | 713(8.3)             | 864(10.1)     | NA                | NA            | 1466(17.1)     | 5543(64.5)    |
| Sesti et al, 2010(27)     | 122(27.7)            |               | NA                | NA            | 106(24.1)      | 212(48.2)     |
| Song et al, 2015(34)      | NA                   | NA            | NA                | NA            | NA             | NA            |
| Mottaghi et al, 2015(28)  | 1817(32)             | 202(3.6)      | 1603(28.3)        | 786(13.9)     | 2103(37.1)     | 1550(27.3)    |
| Panwar et al, 2015(25)    | 4688(21.5)           | 593(2.7)      | 5503(25.2)        | 2661(12.2)    | 8295(38)       | 8046(36.8)    |
| Junk et al, 2015(29)      | 20329(49.3)          | 4835(11.7)    | NA                | NA            | 8587(20.8)     | 7443(18.1)    |
| Nishikawa, et al,2014(30) | NA                   | 650(2.7)      | NA                | NA            | NA             | 2217(9.3)     |
| Hshimoto, et al,2015(31)  | 2122(67.7)           | 445(14.2)     | NA                | NA            | 302(9.6)       | 267(8.5)      |
| Cao et al, 2015(32)       | 3632(53)             | 232(3.4)      | 1852(27)          | 656(9.6)      | 2056(30)       | 932(13.6)     |
| Chang et al,2016(33)      | 36490(58.6)          | NA            | 13149(21.1)       | NA            | 8149(13.1)     | NA            |

NA: data not available.

Supplementary table 2. Risk for developing CKD among individuals with different obesity-metabolic subphenotypes based on various study characteristics.

| subgroup               | strata                    | Metabolically healthy obese group |                     |         | Metabolically obese normal weight group |                     |         | Metabolically abnormal obese group |                     |         |
|------------------------|---------------------------|-----------------------------------|---------------------|---------|-----------------------------------------|---------------------|---------|------------------------------------|---------------------|---------|
|                        |                           | n.                                | Relative risk (95%) | P-value | n.                                      | Relative risk (95%) | P-value | n.                                 | Relative risk (95%) | P-value |
| Definition of MetS     | NECP-ATP III criteria     | 5                                 | 1.23 (0.91,1.66)    | 0.905   | 6                                       | 1.55 (1.35,1.79)    | 0.548   | 6                                  | 1.73 (1.41,2.13)    | 0.118   |
|                        | Non-NECP-ATP III criteria | 2                                 | 1.29 (1.15,1.45)    |         | 1                                       | 1.83 (1.12,2.93)    |         | 1                                  | 3.51 (2.13,5.68)    |         |
| Follow-up duration     | < 5 years                 | 3                                 | 1.50 (1.22,1.86)    | 0.169   | 3                                       | 1.44 (1.09,1.89)    | 0.483   | 3                                  | 2.04 (1.44,2.91)    | 0.704   |
|                        | ≥ 5 years                 | 4                                 | 1.07 (0.83,1.39)    |         | 4                                       | 1.62 (1.39,1.90)    |         | 4                                  | 1.82 (1.33,2.49)    |         |
| Race                   | Asia                      | 6                                 | 1.31(1.21,1.43)     | 0.014   | 6                                       | 1.62 (1.40,1.88)    | 0.392   | 6                                  | 1.99 (1.51,2.62)    | 0.551   |
|                        | U.S.                      | 1                                 | 0.58 (0.38,0.88)    |         | 1                                       | 1.37 (1.00,1.88)    |         | 1                                  | 1.56 (1.16,2.09)    |         |
| Number of participants | < 10000                   | 4                                 | 1.34 (1.13,1.60)    | 0.373   | 4                                       | 1.54 (1.24,1.92)    | 0.832   | 4                                  | 2.24 (1.31,3.84)    | 0.464   |
|                        | > 10000                   | 3                                 | 1.06 (0.70,1.59)    |         | 3                                       | 1.59 (1.34,1.89)    |         | 3                                  | 1.90 (1.50,2.39)    |         |

**Supplementary table 3. Definitions of Metabolic syndrome (MetS)**

| <b>Component</b>                                          | <b>Modified NCEP-ATP III (25,28,29,30,32,34)</b>                        | <b>International Diabetes Federation (31)</b>                   | <b>Modified NCEP-ATP III plus insulin resistance (26,33)</b>            | <b>Insulin resistance (27)</b>                                                             | <b>Other (24)</b>                                                       |
|-----------------------------------------------------------|-------------------------------------------------------------------------|-----------------------------------------------------------------|-------------------------------------------------------------------------|--------------------------------------------------------------------------------------------|-------------------------------------------------------------------------|
| Hypertriglyceridemia                                      | ≥150 mg/dL                                                              | ≥150 mg/dL                                                      | ≥150 mg/dL                                                              | -                                                                                          | ≥150 mg/dL                                                              |
| Low HDL cholesterol                                       | < 40 mg/dL for men,<br>< 50 mg/dL for women                             | < 40 mg/dL for men,<br>< 50 mg/dL for women                     | < 40 mg/dL or men,<br>< 50 mg/dL for women                              | -                                                                                          | <0.9 mmol/L (men),<br><1.0 mmol/L (women)                               |
| High blood pressure                                       | ≥130/85 mm Hg or documented use of antihypertensive therapy             | ≥130/85 mm Hg or treatment of previously diagnosed hypertension | ≥130/85 mm Hg or documented use of antihypertensive therapy             | -                                                                                          | ≥140/90 mm Hg or documented use of antihypertensive therapy             |
| High fasting glucose                                      | ≥110 mg/dL (note: modified in 2005 to be ≥100 mg/dL, or drug treatment) | ≥100 mg/dL or previously diagnosed Type 2 diabetes              | ≥110 mg/dL (note: modified in 2005 to be ≥100 mg/dL, or drug treatment) | -                                                                                          | ≥110 mg/dL (note: modified in 2005 to be ≥100 mg/dL, or drug treatment) |
| Abdominal/central obesity                                 | Waist circumference: >102 cm in men, >88 cm in women                    | ** Waist circumference: ethnicity specific values as below      | -                                                                       | -                                                                                          | -                                                                       |
| High HOMA-IR score or low insulin sensitivity index (ISI) | -                                                                       | -                                                               | > 2.69                                                                  | ISI ≤ 61.3 mg × L <sup>2</sup> × mmol <sup>-1</sup> × mU <sup>-1</sup> × min <sup>-1</sup> | -                                                                       |
| <b>Criteria for metabolic abnormal</b>                    | <b>any 3 of the above 5 features</b>                                    | <b>central obesity** plus 2 of the other components</b>         | <b>At least one of above features</b>                                   | <b>All of above features</b>                                                               | <b>At least one of above features</b>                                   |

HDL-C: High-density lipoprotein cholesterol; HOMA-IR: Homeostatic Model of Assessment-Insulin Resistance index assessment; ISI: insulin sensitivity index derived from OGTT.

\*\* Ethnicity specific values for waist circumference in the International Diabetes Federation definition:

| <i>Ethnic group</i> | <i>Men</i> | <i>Women</i> |
|---------------------|------------|--------------|
| Europeans           | ≥ 94 cm    | ≥ 80 cm      |

|                                                          |                                                                    |              |
|----------------------------------------------------------|--------------------------------------------------------------------|--------------|
| South Asians                                             | $\geq 90$ cm                                                       | $\geq 80$ cm |
| Chinese                                                  | $\geq 90$ cm                                                       | $\geq 80$ cm |
| Japanese                                                 | $\geq 90$ cm                                                       | $\geq 80$ cm |
| Ethnic south and central Americans                       | Use South Asian recommendations until more specific data available |              |
| Sub-Saharan Africans                                     | Use European data until more specific data available               |              |
| Eastern Mediterranean and Middle East (Arab) populations | Use European data until more specific data available               |              |
